# Supplementary material for: Campylobacteriosis in Finland: Passive Surveillance in 2004–2021 and a Pilot Case-Control Study with Whole-Genome Sequencing in Summer 2022
Source: MDPI journal article supplement (doi:10.3390/microorganisms12010132), 2024-01-09
Supplement: s1 [file s1]

**Table S1.** The results of a univariate analysis of exposures associated with domestic *Campylobacter jejuni* -infection (p<0.1).

| Exposure agent                                            | Cases (N=256)<br>exposed<br>% (n/N) | Controls (N=756)<br>exposed<br>% (n/N) | Odds ratio (OR)<br>(95% CI <sup>1</sup> ) | p-value |
|-----------------------------------------------------------|-------------------------------------|----------------------------------------|-------------------------------------------|---------|
| Medication to treat gastric acidity                       | 31 (76/244)                         | 16 (116/728)                           | 2.39 (1.68–3.38)                          | <0.001  |
| Eating unheated berries                                   | 68 (167/245)                        | 83 (622/751)                           | 0.44 (0.32–0.63)                          | <0.001  |
| Swimming in natural waters or drinking untreated water    | 53 (136/255)                        | 39 (294/747)                           | 1.76 (1.31–2.37)                          | <0.001  |
| Eating undercooked broiler or turkey meat                 | 10 (24/247)                         | 1 (7/734)                              | 11.18 (4.58–31.04)                        | <0.001  |
| Eating soft cheeses made with unpasteurized milk          | 25 (58/228)                         | 44 (322/731)                           | 0.43 (0.31–0.61)                          | <0.001  |
| Sorting and/or composting biowaste                        | 59 (147/248)                        | 71 (526/741)                           | 0.59 (0.44–0.81)                          | 0.001   |
| Eating in a restaurant (also takeaway)                    | 69 (172/250)                        | 78 (587/749)                           | 0.61 (0.44–0.85)                          | 0.002   |
| Noticed more flies than usual                             | 3 (8/242)                           | 9 (66/660)                             | 0.34 (0.14–0.73)                          | 0.003   |
| Contact with wild birds or their feces                    | 11 (27/251)                         | 6 (42/751)                             | 2.03 (1.18–3.46)                          | 0.005   |
| Eating fish and/or seafood                                | 75 (182/242)                        | 83 (615/744)                           | 0.64 (0.44–0.92)                          | 0.010   |
| Grilling meat                                             | 50 (123/246)                        | 41 (302/742)                           | 1.46 (1.08–1.97)                          | 0.011   |
| Handling animal feces or manure                           | 25 (57/225)                         | 18 (130/726)                           | 1.56 (1.07–2.25)                          | 0.014   |
| Family member having gastroenteritis                      | 7 (17/250)                          | 3 (24/738)                             | 2.17 (1.07–4.29)                          | 0.015   |
| Eating homegrown vegetables                               | 29 (71/248)                         | 37 (275/746)                           | 0.69 (0.49–0.95)                          | 0.018   |
| Eating minced beef                                        | 80 (194/244)                        | 72 (537/742)                           | 1.48 (1.03–2.15)                          | 0.027   |
| Gutting animals                                           | 4 (10/252)                          | 2 (12/741)                             | 2.51 (0.96–6.42)                          | 0.029   |
| Using cortisone medication                                | 15 (37/240)                         | 11 (78/727)                            | 1.52 (0.96–2.35)                          | 0.052   |
| Eating raw sausage                                        | 7 (18/249)                          | 12 (85/737)                            | 0.60 (0.33–1.03)                          | 0.055   |
| Never using separate utensils for raw meat and vegetables | 15 (35/233)                         | 10 (74/706)                            | 1.51 (0.95–2.37)                          | 0.061   |
| Regular animal contact                                    | 49 (124/254)                        | 42 (318/751)                           | 1.30 (0.97–1.75)                          | 0.072   |
| Living next to a production animal farm                   | 19 (46/248)                         | 14 (100/721)                           | 1.41 (0.94–2.10)                          | 0.076   |
| Eating liver pâté                                         | 4 (10/249)                          | 7 (52/738)                             | 0.55 (0.25–1.12)                          | 0.088   |

<sup>1</sup> = confidence interval
